# Supplementary material
Source: HighWire-hosted journal article supplement (http://www.ajevonline.org/highwire/filestream/10278/field_highwire_adjunct_files/0/Supplemental_Data.pdf)
Supplement: Supplemental_Data.pdf [file Supplemental_Data.pdf]

# Supplemental Data for:

Gale EJ and Moyer MM. 2017.

Cold hardiness of *Vitis vinifera* roots.

Am J Enol Vitic 68:468-477 doi: 10.5344/ajev.2017.16109.

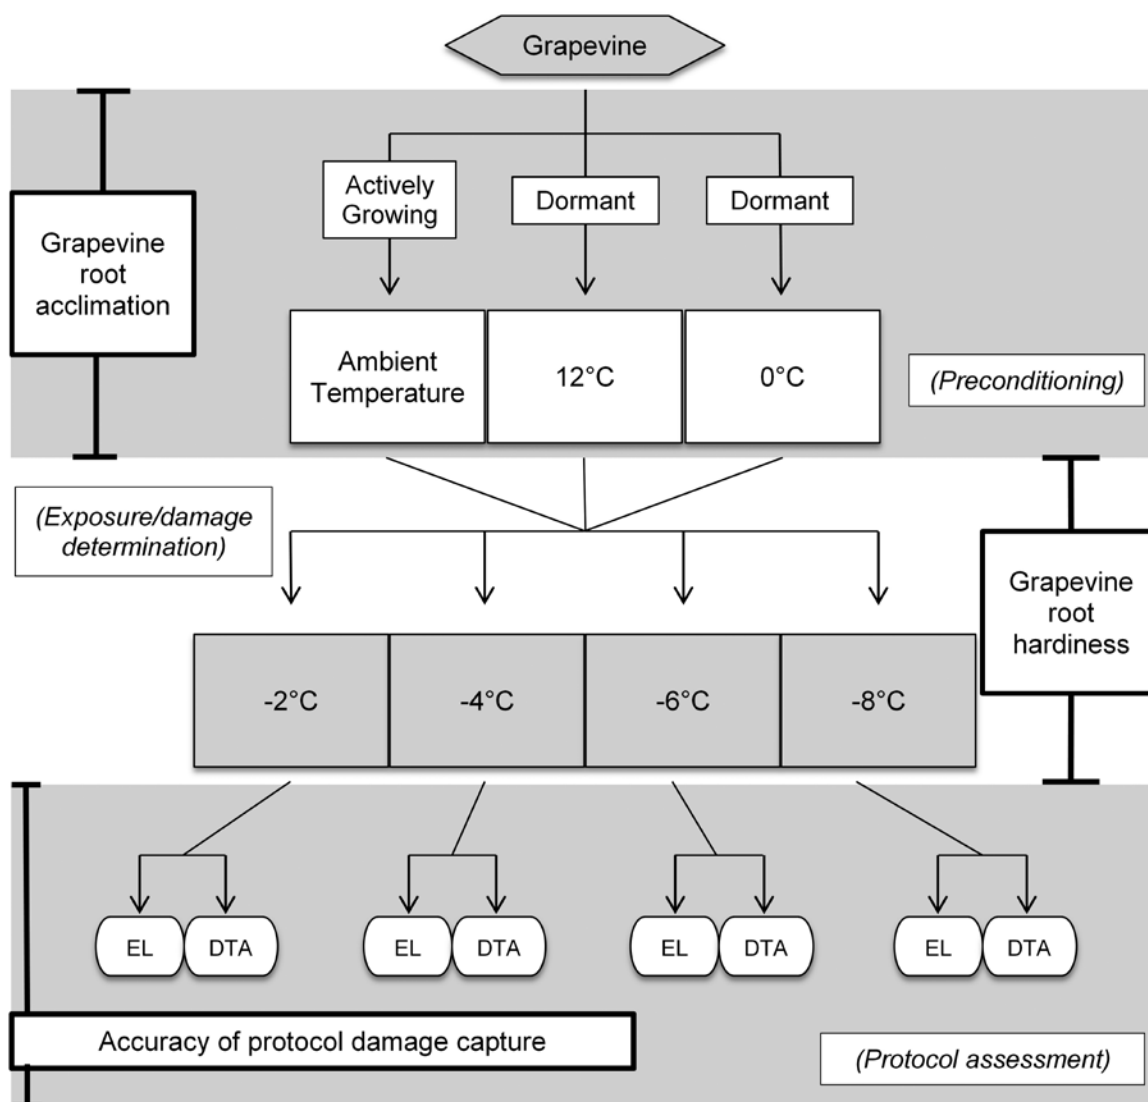

**Supplemental Figure 1** Schematic of experimental protocols. Overview of the experimental process involving the pre-treatments of grapevine material, freeze-protocol temperatures, and the use of electrolyte leakage (EL) and differential thermal analysis (DTA) for assessing grapevine root viability. The chart is further subdivided into shaded areas that highlight which treatment addressed which unknown.
